# Supplementary material for: The Graph Rubric: Development of a Teaching, Learning, and Research Tool
Source: Atypon-hosted journal article supplement (doi:10.1187/cbe.18-01-0007), 2018-11-29
Supplement: combinedsupmats.pdf [file combinedsupmats.pdf]

# Supplemental Material

*CBE—Life Sciences Education*

Angra *et al.*

**Supplemental File Contents:**

Appendix A: Graph rubric citation broken down by source and category

Appendix B: Completed rubric for a sample graph from the rubric training materials for the external stage

Appendix C: Graphs used during the structural stage by both science education scholars and biology graduate students

Appendix D: Graphs critiqued by undergraduate students during the external stage

Appendix E: Descriptions of graphs critiqued by undergraduate students and biology instructors

Appendix F: Detailed IRR between biology instructors and expert rater

Appendix G: Table of citations of graphs from introductory biology textbooks during the external stage

Appendix H: Detailed version of textbook analysis using the graph rubric

## Appendix A: Graph rubric citation broken down by source and category

| Graph Rubric Elements                                                                                                                                                                                                                                                                                                                                                                                                                            | Sources that Informed Descriptions                                                                                                                                                                                                                                                                                                                                                                                                        |
|--------------------------------------------------------------------------------------------------------------------------------------------------------------------------------------------------------------------------------------------------------------------------------------------------------------------------------------------------------------------------------------------------------------------------------------------------|-------------------------------------------------------------------------------------------------------------------------------------------------------------------------------------------------------------------------------------------------------------------------------------------------------------------------------------------------------------------------------------------------------------------------------------------|
| <p><b>Descriptive title</b></p> <p>a) in the form of a statement</p> <p>b) mention the subject</p> <p>c) appropriate variables</p> <p>d) include relevant details about the experiment that help understand the take home message.</p>                                                                                                                                                                                                           | <p><b>Kosslyn, 1994; Evergreen, 2018</b></p> <p><u>Angra &amp; Gardner, 2017</u></p> <p><u>Angra &amp; Gardner, 2017</u></p> <p><i>Puhan et al. 2006; Angra &amp; Gardner, 2017</i></p>                                                                                                                                                                                                                                                   |
| <p><b>Label for the X axis (e.g. time)</b></p> <p>a) appropriate and descriptive for the experiment.</p> <p>b) graphs with categorical independent variables should have a label under each set of data and a larger label under all data plotted.</p>                                                                                                                                                                                           | <p><b>Kosslyn, 1994; Few, 2004; Federico et al., 2012</b></p> <p><i>Puhan et al. 2006; Angra &amp; Gardner, 2017</i></p> <p><i>Elliot et al., 2006; Puhan et al. 2006; Angra &amp; Gardner, 2017</i></p>                                                                                                                                                                                                                                  |
| <p><b>Label for the Y axis (e.g. heart rate)</b></p> <p>• Should be appropriate and descriptive for the experiment. If the data is manipulated (average, change, percentage, etc.), then it should be indicated on the y axis.</p>                                                                                                                                                                                                               | <p><b>Kosslyn, 1994; Few, 2004; Federico et al., 2012</b></p> <p><i>Elliot et al., 2006; Puhan et al. 2006; Angra &amp; Gardner, 2017</i></p>                                                                                                                                                                                                                                                                                             |
| <p><b>Units for the X axis (e.g. seconds)</b></p> <p>• Should be appropriate and descriptive for the data displayed.</p>                                                                                                                                                                                                                                                                                                                         | <p><i>Leinhardt et al., 1990; Puhan et al. 2006</i></p>                                                                                                                                                                                                                                                                                                                                                                                   |
| <p><b>Units for the Y axis (e.g. average beats per minute)</b></p> <p>• Should be appropriate and descriptive for the data displayed.</p>                                                                                                                                                                                                                                                                                                        | <p><i>Leinhardt et al., 1990; Puhan et al. 2006</i></p>                                                                                                                                                                                                                                                                                                                                                                                   |
| <p><b>Scale (appropriate intervals and range for data)</b></p> <p>a) Increments are clear and without clutter</p> <p>b) appropriate significant figures.</p> <p>c) If the scale is discontinuous or doesn't start at the origin, it should be indicated by a break in the axis.</p>                                                                                                                                                              | <p><i>Cleveland, 1994</i></p> <p><b>Tufte, 1983; Leinhardt et al., 1990; Kosslyn, 1994; Few, 2004; Duke et al., 2015; Evergreen, 2018</b></p> <p><b>Evergreen, 2018</b></p> <p><b>Kosslyn, 1994; Duke et al., 2015</b></p>                                                                                                                                                                                                                |
| <p><b>Key (defines different data sets that are plotted)</b></p> <p>a) descriptions of different colors (if applicable)</p> <p>b) the sample size</p> <p>c) the number of trials.</p>                                                                                                                                                                                                                                                            | <p><b>Few, 2004; Evergreen, 2018</b></p> <p><u>Angra &amp; Gardner, 2017</u></p> <p><u>Angra &amp; Gardner, 2017</u></p>                                                                                                                                                                                                                                                                                                                  |
| <p><b>Ease of Understanding-Aesthetics</b></p> <p>a) the data plotted takes up sufficient room in the Cartesian plane</p> <p>b) makes use of legible size font</p> <p>c) the x and y axis lines are clear and legible</p> <p>d) the graph displays data in an appropriate number of bars and lines (maximize data-ink ratio)</p> <p>e) is devoid of chart junk elements such as: distracting background colors, patterns, and dark gridlines</p> | <p><b>Tufte, 1983</b></p> <p><b>Kosslyn, 1994; Stengel et al., 2008; Duke et al., 2015; Evergreen, 2018</b></p> <p><i>Duke et al., 2015; Evergreen, 2018</i></p> <p><b>Tufte, 1983; Kosslyn, 1994; Puhan et al. 2006; Duke et al., 2015</b></p> <p><b>Tufte, 1983; Cooper et al., 2003; Puhan et al. 2006; Stengel et al., 2008; Federico et al., 2012; Evergreen, 2014; Rougier et al., 2014; Duke et al., 2015; Evergreen, 2018</b></p> |
| <p><b>Ease of Understanding-Take home message</b></p> <p>a) If the graph has sound construction and mechanics that allow for clear sorting of trends.</p> <p>b) Easy to formulate a take home message.</p>                                                                                                                                                                                                                                       | <p><i>Cooper et al., 2003; Rougier et al., 2014; Evergreen, 2018</i></p> <p><i>Cooper et al., 2003; Federico et al., 2012; Rougier et al., 2014; Duke et al., 2015; Evergreen, 2018</i></p>                                                                                                                                                                                                                                               |
| <p><b>Graph Type (Bar, line, scatter, dot, box and whisker)</b></p> <p>Data displayed in a graph is appropriate for both independent and dependent experimental variables (i.e. categorical and continuous) and data. (*Referring to the data form)</p>                                                                                                                                                                                          | <p><i>Padilla et al., 1986; Cleveland, 1994; Kosslyn, 1994; Schriger &amp; Cooper, 2001; Few, 2004; Leonard &amp; Patterson, 2004; Patterson &amp; Leonard, 2005; Drummond et al., 2011; Franzblau &amp; Chung, 2012; Humphrey et al., 2013; Duke et al., 2015; Saxon, 2015; Weissgerber et al., 2015; Klaus, 2016; Evergreen, 2018; Angra &amp; Gardner, 2016; Angra &amp; Gardner, 2017</i></p>                                         |
| <p><b>Data Displayed (Raw, Averages, Changes, Percentage)</b></p> <p>If the graph indicates the type of data (ex. Raw, averages, etc.) that are plotted. There should be a clear distinction between raw data and manipulated data based on the information presented in the key (ie. sample size and number of trials) and axis label. If the graph is showing averages, then it should also be accompanied with STDEV or error bars.</p>       | <p><i>Wild and Pfannkuch, 1999; Friel &amp; Bright, 1996; Konold &amp; Higgins, 2003; Konold et al., 2015</i></p>                                                                                                                                                                                                                                                                                                                         |
| <p><b>*Alignment* (at least one of the graphs presented should align with the research question and hypothesis. Other graphs can be exploratory.)</b></p> <p>If the graph is completely aligned with the research question and/or hypothesis. In other words, the independent, dependent variables, and information about the experiment are explicit.</p>                                                                                       | <p><i>Konold &amp; Higgins, 2003; Rougier et al., 2014</i></p> <p><u>Angra &amp; Gardner, 2016; Angra &amp; Gardner, 2017</u></p>                                                                                                                                                                                                                                                                                                         |

Appendix B: Completed rubric for a sample graph from the rubric training materials for the external stage. Complete version is available upon request by the corresponding author.

|                           |                                                                          |
|---------------------------|--------------------------------------------------------------------------|
| <b>Research Question:</b> | Does temperature affect the growth rate of this type of bacteria?        |
| <b>Hypothesis:</b>        | The bacteria will have different growth rates at different temperatures. |

|                        | <b>ID of graph or set of graphs:</b>                                                                                                                                                                                                                                                                                                                                                                                                                                                                                            | <b>Excellent (2)</b> | <b>Present but Needs Improvement (1)</b>                                                                                                     | <b>Absent/Inappropriate (0)</b> |
|------------------------|---------------------------------------------------------------------------------------------------------------------------------------------------------------------------------------------------------------------------------------------------------------------------------------------------------------------------------------------------------------------------------------------------------------------------------------------------------------------------------------------------------------------------------|----------------------|----------------------------------------------------------------------------------------------------------------------------------------------|---------------------------------|
| <b>Graph Mechanics</b> | <b>Descriptive title</b><br><b>P/A-</b> Should be: a) in the form of a statement, b) mention the subject, c) appropriate variables, and d) include relevant details about the experiment that help understand the take home message.<br><b>NI-</b> If the title is missing any one of the four points mentioned above.                                                                                                                                                                                                          |                      | Needs to be in a statement, mention the subject (bacteria), and include details about the experiment (temperatures)                          |                                 |
|                        | <b>Label for the X axis</b> (e.g. time)<br><b>P/A-</b> Should be appropriate and descriptive for the experiment. For graphs with categorical independent variables, there needs to be a label under each set of data and a larger label under all data plotted.<br><b>NI-</b> If the label is missing any one of the points mentioned above.                                                                                                                                                                                    | x                    |                                                                                                                                              |                                 |
|                        | <b>Label for the Y axis</b> (e.g. heart rate)<br><b>P/A-</b> Should be appropriate and descriptive for the experiment. If the data is manipulated (average, change, percentage, etc.), then it should be indicated on the y axis.<br><b>NI-</b> If the label is missing any one of the points mentioned above.                                                                                                                                                                                                                  |                      | Should say "Average Number of Cells", since that is the data plotted.                                                                        |                                 |
|                        | <b>Units for the X axis</b> (e.g. seconds)<br><b>P/A-</b> Should be appropriate and descriptive for the data displayed.<br><b>NI-</b> If the units are not appropriate or descriptive.                                                                                                                                                                                                                                                                                                                                          | x                    |                                                                                                                                              |                                 |
|                        | <b>Units for the Y axis</b> (e.g. average beats per minute)<br><b>P/A-</b> Should be appropriate and descriptive for the data displayed.<br><b>NI-</b> If the units are not appropriate or descriptive.                                                                                                                                                                                                                                                                                                                         | x                    |                                                                                                                                              |                                 |
|                        | <b>Scale</b> (appropriate intervals and range for data)<br><b>P/A-</b> Should be appropriate for the data displayed such that the increments are clear and without clutter and includes appropriate significant figures. If the scale is discontinuous or doesn't start at the origin, it should be indicated by a break in the axis.<br><b>NI-</b> If the scale is not appropriate for the data such that it is cluttered, does not include appropriate significant figures, and/or if the scale does not indicate axis break. |                      | The y axis can be re-scaled so that it goes from -2 to 26 and a proper increment should be chosen so that numbers do not clutter the y axis. |                                 |
|                        | <b>Key</b> (defines different data sets that are plotted)<br><b>P/A-</b> Should be appropriate and descriptive for the data displayed. It should include: a) descriptions of different colors (if applicable), b) the sample size and c) the number of trials.<br><b>NI-</b> If the key is not descriptive and does not indicate the sample size.                                                                                                                                                                               |                      | Since the graph is showing averages, a key showing the sample size for each temperature is necessary.                                        |                                 |

|                                                                                                                                                                                                                                                                                                                                                                                                                                                                                                                                                                                                                                                                                                                                                                                                                                                                                                                                                                                                                                                                                                                                                                                                                                                                                                                                                                                                                                                                                                                                                                                                                                                                                                                                                                                                                                              | Excellent (2) | Present but Needs Improvement (1)                                                                                                                                                                                                                                                                                                                                                                                               | Absent/Inappropriate (0)                                                                                                                                                                                                    |
|----------------------------------------------------------------------------------------------------------------------------------------------------------------------------------------------------------------------------------------------------------------------------------------------------------------------------------------------------------------------------------------------------------------------------------------------------------------------------------------------------------------------------------------------------------------------------------------------------------------------------------------------------------------------------------------------------------------------------------------------------------------------------------------------------------------------------------------------------------------------------------------------------------------------------------------------------------------------------------------------------------------------------------------------------------------------------------------------------------------------------------------------------------------------------------------------------------------------------------------------------------------------------------------------------------------------------------------------------------------------------------------------------------------------------------------------------------------------------------------------------------------------------------------------------------------------------------------------------------------------------------------------------------------------------------------------------------------------------------------------------------------------------------------------------------------------------------------------|---------------|---------------------------------------------------------------------------------------------------------------------------------------------------------------------------------------------------------------------------------------------------------------------------------------------------------------------------------------------------------------------------------------------------------------------------------|-----------------------------------------------------------------------------------------------------------------------------------------------------------------------------------------------------------------------------|
| <p><b>Communication</b></p> <p><b>Ease of Understanding-Aesthetics</b><br/> <b>E-</b> If the graph is aesthetically pleasing, meaning that: a) the data plotted takes up sufficient room in the Cartesian plane, b) makes use of legible size font, c) the x and y axis lines are clear and legible, d) the graph displays data in an appropriate number of bars and lines, and e) is devoid of chart junk elements such as: distracting background colors, patterns, and dark gridlines<br/> <b>NI-</b> If the graph has one of the following flaws: a) the graph displays too much white space, b) the font size is too small, c) the x and y axis lines are not clear and legible, d) the graph shows too many bars or lines OR e) elements of chart junk are clouding interpretation of data.<br/> <b>U-</b> If the graph has multiple flaws, which interfere with the understanding and interpretation of data.</p> <p><b>Ease of Understanding-Take home message</b><br/> <b>E-</b> If the graph has sound construction and mechanics that allow for clear sorting of trends and take home message.<br/> <b>NI-</b> If data trends are difficult to observe or it is difficult to formulate a proper take home message.<br/> <b>U-</b> If the graph is ineffective at communicating data trends and take home message, such that it causes confusion.</p>                                                                                                                                                                                                                                                                                                                                                                                                                                                                              |               |                                                                                                                                                                                                                                                                                                                                                                                                                                 | <p>This graph has multiple flaws: the gridlines are distracting, there is unnecessary white space above the data lines, and the two data lines are similar in color. Overall, there is a lot of chartjunk in this graph</p> |
| <p><b>Graph Choice</b></p> <p><b>Graph Type (Bar, line, scatter, dot, box and whisker)</b><br/> <b>E-</b> If data displayed in a graph is appropriate for both independent and dependent experimental variables (i.e. categorical and continuous) and data. (*Referring to the data form)<br/> <b>NI-</b> If data displayed in a graph is a) not suitable for either the dependent or independent experimental variables OR b) there is a better way to present data.<br/> <b>U-</b> If the graph type is not suitable for both experimental variables.</p> <p><b>Data Displayed (Raw, Averages, Changes, Percentage)</b><br/> <b>E-</b> If the graph indicates the type of data (ex. Raw, averages, etc.) that are plotted. There should be a clear distinction between raw data and manipulated data based on the information presented in the key (ie. sample size and number of trials) and axis label. If the graph is showing averages, then it should also be accompanied with STDEV or error bars.<br/> <b>NI-</b> If the graph is missing one of points mentioned above.<br/> <b>U-</b> If data type is inappropriate for the graph type</p> <p><b>*Alignment*</b> (at least one of the graphs presented should align with the research question and hypothesis. Other graphs can be exploratory.)<br/> <b>E-</b> If the graph is completely aligned with the research question and/or hypothesis. In other words, the independent, dependent variables, and information about the experiment are explicit.<br/> <b>NI-</b> If the graph is partially aligned with the research question and/or hypothesis. In other words, the graph is missing information about either the independent, dependent, or details about the experiment.<br/> <b>U-</b> If the graph is not aligned with the research question and/or hypothesis.</p> |               | <p>Although it is easy to note the trends in this graph, it is difficult to formulate an accurate take home message since the subject, bacteria is not mentioned in the graph.</p> <p>Since the graph is showing averages, the data points need to be accompanied with error bars.</p> <p>The graph is partially aligned with the research question and hypothesis because it does not display information on the subjects.</p> |                                                                                                                                                                                                                             |

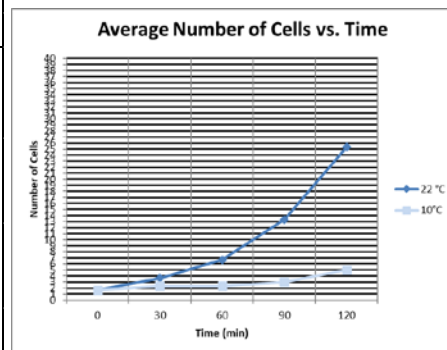

Appendix C: Graphs used during the structural stages by science education researchers and graduate students

### **GRAPH 1**

The scatter and line graphs below were used only by the science education researchers during the first round of the structural stage for feedback:

- **Question:** Do different genres of music affect an individual's heart rate?
- **Hypothesis:** Music genres do affect a person's heart rate differently.

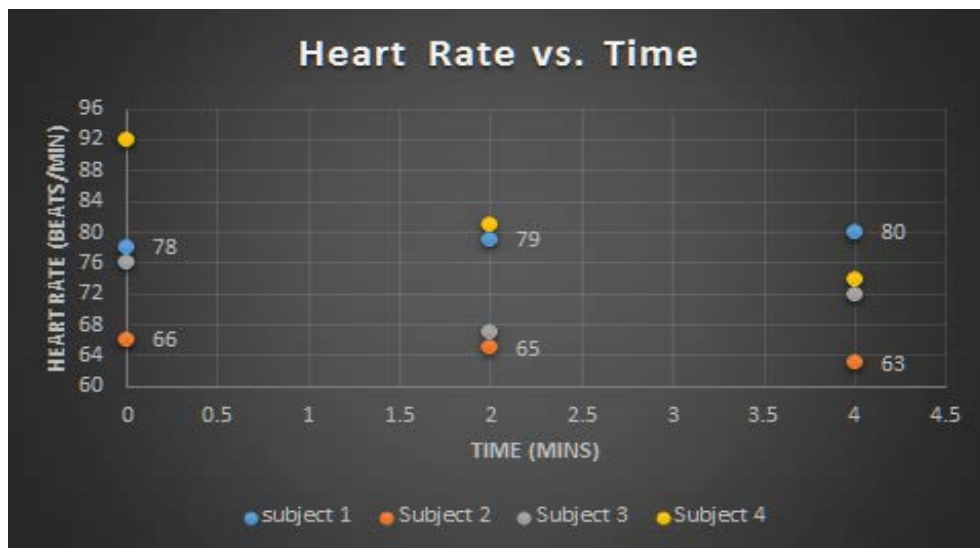

## GRAPH 2

**Question:** Does listening to music increase or decrease the HR and MAP depending on the genre?  
**Hypothesis:** Slower music will decrease the HR below normal levels whereas listening to upbeat/faster music will increase the HR

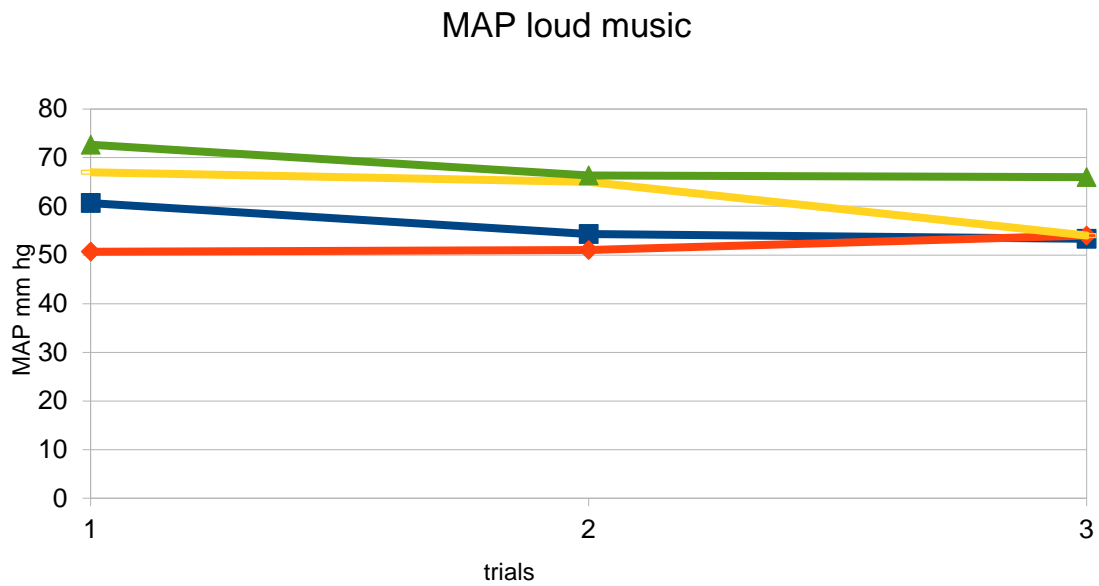

### GRAPH 3

The graph below was used by both science education researchers and graduate students during the second round of the structural stage.

- **Question:** How does the conduction velocity in the median giant axon alter with a change in temperature?
- **Hypothesis:** We hypothesize temperature affects the conduction velocity of the median giant axon.

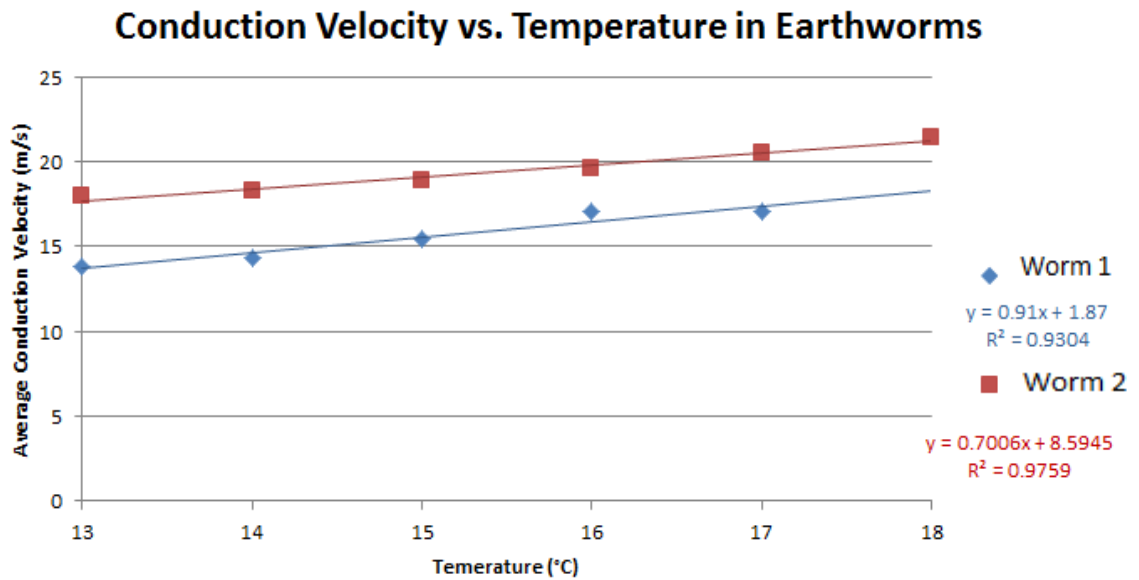



Appendix D: Graphs critiqued by undergraduate students during the external stage.

**Graph 1**

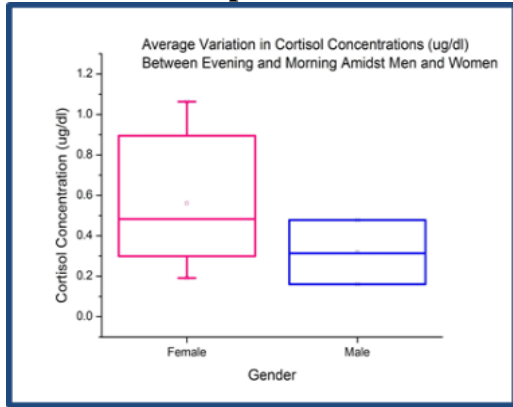

**Graph 2**

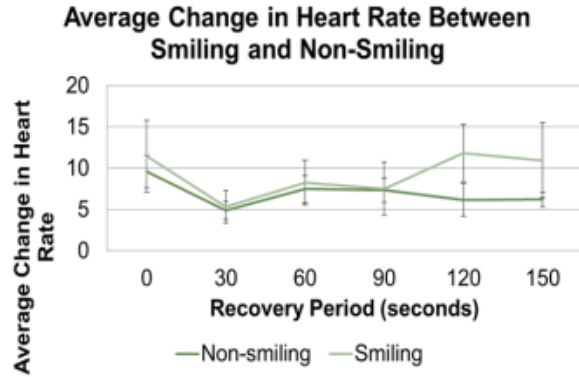

**Graph 3**

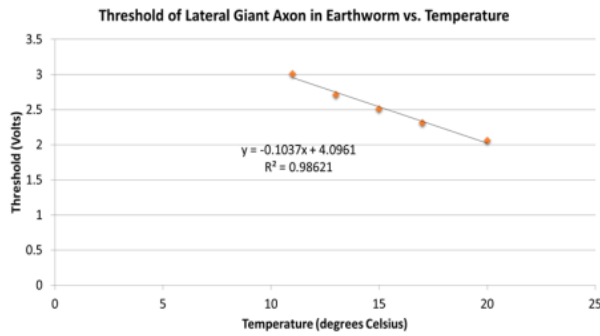

**Graph 4**

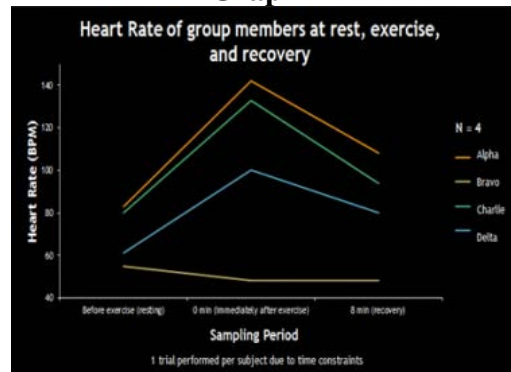

**Graph 5**

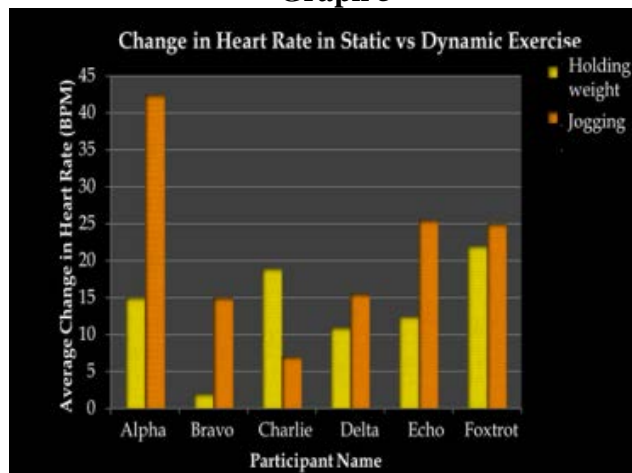

Appendix E- Descriptions of graphs critiqued by students and professors

Table E.1- Descriptions of graphs critiqued by undergraduate students who were students in a physiology laboratory, where they had repeated practice with the graph rubric during the Spring 2015 semester. *These are descriptions of graphs in Appendix D.*

|                    | Graph #                      | 1                                               | 2                                                                          | 3                                                  | 4                                                         | 5                                                         |
|--------------------|------------------------------|-------------------------------------------------|----------------------------------------------------------------------------|----------------------------------------------------|-----------------------------------------------------------|-----------------------------------------------------------|
| Graph Descriptions | Type                         | Box and whisker                                 | Line                                                                       | Scatter                                            | Line                                                      | Double bar                                                |
|                    | Context-Physiology Topic Lab | Cortisol                                        | Cardiovascular                                                             | Action potentials                                  | Cardiovascular                                            | Student's choice                                          |
|                    | Other Descriptors            | Cortisol concentration, two categories plotted. | Average change in heart rate between smiling and non-smiling; mean +/- SEM | Decreasing slope; lots of white space on the graph | Black background with 4 smooth lines of a different color | Black background; paired bars showing mean but no +/- SEM |

Table E.2- Descriptions of student constructed graphs that were critiqued by Instructor 1 who taught an upper-level field ecology course and a freshman-level Course-Based Undergraduate Research Experience (CURE).

|                    | Graph #           | 1                                                | 2                              | 3                                     | 4                              | 5                                                    | 6                                      | 7                                           | 8                                      |
|--------------------|-------------------|--------------------------------------------------|--------------------------------|---------------------------------------|--------------------------------|------------------------------------------------------|----------------------------------------|---------------------------------------------|----------------------------------------|
| Graph Descriptions | Type              | Bar                                              | Scatter                        | Bar                                   | Scatter                        | Bar                                                  | Bar                                    | Stacked bar                                 | Bar                                    |
|                    | Context           | Field Ecology                                    | Field Ecology                  | Field Ecology                         | Field Ecology                  | Field Ecology                                        | Field Ecology                          | CURE                                        | CURE                                   |
|                    | Other descriptors | Five treatments; percentage of measured variable | Scatter with linear regression | Two categories; Average +/- error bar | Scatter with linear regression | Three sampling days; Proportion of measured variable | Paired bar graph; average w/ error bar | Two treatments; two categories (% for each) | Four treatments; Average +/- error bar |

Table E.3- Descriptions of student constructed graphs that were critiqued by Instructor 2 who taught a sophomore-level cell biology and neurobiology.

|                    | Graph #           | 1-5                                                               | 6               | 7                                      | 8                      | 9                           | 10                                  |
|--------------------|-------------------|-------------------------------------------------------------------|-----------------|----------------------------------------|------------------------|-----------------------------|-------------------------------------|
| Graph Descriptions | Type              | Line                                                              | Line and symbol | Paired bars                            | Line and symbol        | Bar                         | Box and whisker                     |
|                    | Context           | Cell Biology                                                      | Neurobiology    | Neurobiology                           | Neurobiology           | Neurobiology                | Neurobiology                        |
|                    | Other descriptors | Exam question graph sketches; Bond energies to determine DNA form | Four conditions | Treatment and control for eight trials | Baseline and treatment | Three conditions to compare | Before, during, and after treatment |

Table E.4- Descriptions of student constructed graphs that were critiqued by Instructor 3 who taught an upper-level conservation biology course.

|                    | Graph #           | 1                                  | 2                                                                                     | 3                                                           | 4                                                     | 5                                                    |
|--------------------|-------------------|------------------------------------|---------------------------------------------------------------------------------------|-------------------------------------------------------------|-------------------------------------------------------|------------------------------------------------------|
| Graph Descriptions | Type              | Line                               | Scatter                                                                               | Scatter                                                     | Line and symbol                                       | Bar                                                  |
|                    | Context           | Conservation biology               | Conservation biology                                                                  | Conservation biology                                        | Conservation biology                                  | Conservation biology                                 |
|                    | Other descriptors | Raw simulation output for 100 runs | Average +/- error bars for three simulated conditions (100 iterations over 200 years) | Average +/- error bars for four independent variable values | Average +/- error bars for three different conditions | Average +/- error bars for four different conditions |

Table E.5a- Descriptions of student constructed graphs that were critiqued by Instructor 4 in the neurophysiology context.

|                           | <b>Graph #</b>           | <b>1</b>                     | <b>2</b>                       | <b>3</b>                       | <b>4</b>                       |
|---------------------------|--------------------------|------------------------------|--------------------------------|--------------------------------|--------------------------------|
| <b>Graph Descriptions</b> | <b>Type</b>              | Scatter                      | Scatter                        | Scatter                        | Scatter                        |
|                           | <b>Context</b>           | Neurophysiology              | Neurophysiology                | Neurophysiology                | Neurophysiology                |
|                           | <b>Other descriptors</b> | Scatter with regression line | Measurements from two subjects | Measurements from two subjects | Measurements from two subjects |

Table E.5b- Descriptions of student constructed graphs that were critiqued by Instructor 4 in the endocrine physiology context.

|                           | <b>Graph #</b>           | <b>1</b>                 | <b>2</b>                                 | <b>3</b>                     | <b>4</b>             |
|---------------------------|--------------------------|--------------------------|------------------------------------------|------------------------------|----------------------|
| <b>Graph Descriptions</b> | <b>Type</b>              | Line and symbol          | Bars                                     | Scatter                      | Box and whisker      |
|                           | <b>Context</b>           | Endocrine physiology     | Endocrine physiology                     | Endocrine physiology         | Endocrine physiology |
|                           | <b>Other descriptors</b> | Two conditions over time | One measured variable at six time points | Scatter with regression line | Four conditions      |

Table E.5c- Descriptions of student constructed graphs that were critiqued by Instructor 4 in the cardiovascular physiology context.

|                           |                          | <b>G1</b>                                                       | <b>G2</b>                              | <b>G3</b>                                                                                          | <b>G4</b>                    |
|---------------------------|--------------------------|-----------------------------------------------------------------|----------------------------------------|----------------------------------------------------------------------------------------------------|------------------------------|
| <b>Graph Descriptions</b> | <b>Type</b>              | Line and symbol                                                 | Line                                   | Paired bars                                                                                        | Scatter                      |
|                           | <b>Context</b>           | Cardiovascular physiology                                       | Cardiovascular physiology              | Cardiovascular physiology                                                                          | Cardiovascular physiology    |
|                           | <b>Other descriptors</b> | Data for four subjects at three time points; plotted separately | Two treatments with three trial points | Three sets of paired bars (change for three measured variables) with two treatment conditions each | Scatter with regression line |

Appendix F- Detailed IRR agreement between biology instructors and expert rater

\* average from the overall rubric scoring across graphs for each instructor

n = number of graphs evaluated

|                        | <b>Graph Rubric Category</b>                    | <b>Instructor 1<br/>(n = 8)</b> | <b>Instructor 2<br/>(n = 10)</b> | <b>Instructor 3<br/>(n=5)</b> | <b>Instructor 4<br/>(n =12)</b> |
|------------------------|-------------------------------------------------|---------------------------------|----------------------------------|-------------------------------|---------------------------------|
| <b>Graph Mechanics</b> | Descriptive Title                               | 100                             | 70                               | 60                            | 83                              |
|                        | Label for the X axis                            | 100                             | 70                               | 40                            | 100                             |
|                        | Label for the Y axis                            | 62.5                            | 80                               | 100                           | 67                              |
|                        | Units for the X axis                            | 75                              | 100                              | 100                           | 75                              |
|                        | Units for the Y axis                            | 62.5                            | 100                              | 60                            | 92                              |
|                        | Scale                                           | 100                             | 60                               | 80                            | 83                              |
|                        | Key                                             | 100                             | 30                               | 60                            | 83                              |
| <b>Communication</b>   | Ease of Understanding- Aesthetics               | 75                              | 50                               | 40                            | 67                              |
|                        | Ease of Understanding- Take home message        | 75                              | 90                               | 100                           | 67                              |
| <b>Graph Choice</b>    | Graph Type                                      | 100                             | 90                               | 80                            | 67                              |
|                        | Data Displayed                                  | 62.5                            | 80                               | 60                            | 67                              |
|                        | Alignment                                       | 87.5                            | 70                               | 80                            | 83                              |
|                        | <b>Average (%) Task Interrater Reliability*</b> | <b>83 ± 9</b>                   | <b>74 ± 4</b>                    | <b>72 ±15</b>                 | <b>78 ± 7</b>                   |

Appendix G: Table of citations of graphs from introductory biology textbooks during the external stage

| <b>Textbook</b>          | <b>Randomly Selected Chapters</b>      | <b>Number of Pages Analyzed</b> | <b>Number of Graphs Analyzed</b>                 | <b>Graphs Randomly Selected for IRR agreement</b>                                                                                                                                                                                                                                   |
|--------------------------|----------------------------------------|---------------------------------|--------------------------------------------------|-------------------------------------------------------------------------------------------------------------------------------------------------------------------------------------------------------------------------------------------------------------------------------------|
| Campbell et al., 2011    | 1, 2, 5, 9, 10, 15, 22, 23, 26, 29     | n/a online textbook             | 204 graphs present, but analyzed 40 graphs (20%) | Chapter 1, graph 1.21<br>Chapter 2, graph 2.19<br>Chapter 5, left graph 5.9<br>Chapter 9, top graph 9.22<br>Chapter 10, graph 10.2<br>Chapter 15, middle graph in panel A 15.11<br>Chapter 22, graph 22.7<br>Chapter 29, graph 29.14                                                |
| Raven et al., 2008       | 20, 23, 25, 28, 34, 44, 45, 52, 58, 59 | 203                             | 43                                               | Chapter 20, graph 20.1<br>Chapter 20, bottom graph 20.13<br>Chapter 20, graph 20.16<br>Chapter 23, graph 23.12<br>Chapter 44, graph 44.8<br>Chapter 45, graph 45.18<br>Chapter 58, graph 58.8<br>Chapter 59, graph 59.4<br>Chapter 59, graph 59.15                                  |
| Sadava et al., 2009      | 5, 11, 14, 28, 38, 45, 52, 53, 56, 57  | 207                             | 35                                               | Chapter 28, <i>Investigating Life</i> top graph 28.9<br>Chapter 45, <i>Tools for Investigating Life</i> graph 45.8<br>Chapter 45, graph 45.11<br>Chapter 45, graph 45.15<br>Chapter 45, graph 45.17<br>Chapter 52, <i>Investigating Life</i> graph 52.17<br>Chapter 57, graph 57.9a |
| Singh-Cundy & Shin, 2015 | 2, 3, 19, 20, 22, 26, 27, 29, 30, 33   | 227                             | 17                                               | Chapter 20, graph 20.3a<br>Chapter 26, <i>Biology Matters</i> bottom graph<br>Chapter 29, top graph 29.9                                                                                                                                                                            |
| Urry et al., 2014        | 3, 4, 6, 11, 13, 18, 22, 29, 32, 38    | 211                             | 18                                               | Chapter 6, graph 6.6<br>Chapter 6, graph 6.16<br>Chapter 38, <i>Scientific Skills</i> graph                                                                                                                                                                                         |

1. Campbell, A., Heyer, L., Paradise, C., Sellers, P., & Barsoum, M. (2011, January). Integrating Concepts in Biology for Introductory College Biology. In *Molecular Biology of the Cell* (Vol. 22). 8120 Woodmont Ave, Ste 750, Bethesda, MD 20814-2755 USA: Amer Soc Cell Biology.
2. Raven, P. H., Johnson, G. B., Losos, J. B., Mason, K. A. & Singer, S. R. (2008): *Biology*, 8th ed.; Boston (McGraw-Hill).
3. Sadava, D. E., Hillis, D. M., Heller, H. C., & Berenbaum, M. (2009). *Life: the science of biology* (Vol. 2). Macmillan.
4. Singh-Cundy, A., Shin, G. (2010). *Discover biology* (6<sup>th</sup> Edition). Sinauer Associates, Inc.
5. Urry, L. A., Cain, M. L., Wasserman, S. A., Minorsky, P. V., Jackson, R. B., & Reece, J. B. (2014). *Campbell biology in focus*. Pearson.

Appendix H: Detailed Version of Textbook Analysis using the Graph Rubric.

|                        | <b>Graph Rubric Category</b> | <b>Textbooks</b>         | <b>Present/Appropriate</b> | <b>Needs Improvement</b> | <b>Unsatisfactory</b> |
|------------------------|------------------------------|--------------------------|----------------------------|--------------------------|-----------------------|
| <b>Graph Mechanics</b> | Descriptive Title            | Singh-Cundy & Shin, 2015 | 83                         | 0                        | 17                    |
|                        |                              | Urry et al., 2014        | 33                         | 60                       | 7                     |
|                        |                              | Sadava et al., 2009      | 89                         | 11                       | 0                     |
|                        |                              | Raven et al., 2008       | 90                         | 10                       | 0                     |
|                        |                              | Campbell et al., 2011    | 65                         | 35                       | 0                     |
|                        | Label for the X axis         | Singh-Cundy & Shin, 2015 | 92                         | 8                        | 0                     |
|                        |                              | Urry et al., 2014        | 87                         | 13                       | 0                     |
|                        |                              | Sadava et al., 2009      | 83                         | 8                        | 9                     |
|                        |                              | Raven et al., 2008       | 74                         | 10                       | 16                    |
|                        |                              | Campbell et al., 2011    | 62                         | 26                       | 12                    |
|                        | Label for the Y axis         | Singh-Cundy & Shin, 2015 | 84                         | 8                        | 8                     |
|                        |                              | Urry et al., 2014        | 100                        | 0                        | 0                     |
|                        |                              | Sadava et al., 2009      | 94                         | 3                        | 3                     |
|                        |                              | Raven et al., 2008       | 95                         | 5                        | 0                     |
|                        |                              | Campbell et al., 2011    | 64                         | 36                       | 0                     |
|                        | Units for the X axis         | Singh-Cundy & Shin, 2015 | 92                         | 0                        | 8                     |
|                        |                              | Urry et al., 2014        | 67                         | 0                        | 33                    |
|                        |                              | Sadava et al., 2009      | 75                         | 0                        | 25                    |
|                        |                              | Raven et al., 2008       | 88                         | 0                        | 12                    |
|                        |                              | Campbell et al., 2011    | 97                         | 0                        | 3                     |
|                        | Units for the Y axis         | Singh-Cundy & Shin, 2015 | 50                         | 0                        | 50                    |
|                        |                              | Urry et al., 2014        | 60                         | 0                        | 40                    |
|                        |                              | Sadava et al., 2009      | 72                         | 0                        | 28                    |
|                        |                              | Raven et al., 2008       | 93                         | 0                        | 7                     |
|                        |                              | Campbell et al., 2011    | 85                         | 0                        | 15                    |

Appendix H: Detailed Version of Textbook Analysis using the Graph Rubric.

|               |                                             |                          |    |    |    |
|---------------|---------------------------------------------|--------------------------|----|----|----|
|               | Scale                                       | Singh-Cundy & Shin, 2015 | 33 | 25 | 42 |
|               |                                             | Urry et al., 2014        | 27 | 46 | 27 |
|               |                                             | Sadava et al., 2009      | 42 | 42 | 16 |
|               |                                             | Raven et al., 2008       | 52 | 48 | 0  |
|               |                                             | Campbell et al., 2011    | 91 | 9  | 0  |
|               | Key                                         | Singh-Cundy & Shin, 2015 | 55 | 45 | 0  |
|               |                                             | Urry et al., 2014        | 53 | 47 | 0  |
|               |                                             | Sadava et al., 2009      | 69 | 31 | 0  |
|               |                                             | Raven et al., 2008       | 38 | 62 | 0  |
|               |                                             | Campbell et al., 2011    | 23 | 77 | 0  |
| Communication | Ease of Understanding-<br>Aesthetics        | Singh-Cundy & Shin, 2015 | 42 | 58 | 0  |
|               |                                             | Urry et al., 2014        | 67 | 33 | 0  |
|               |                                             | Sadava et al., 2009      | 72 | 28 | 0  |
|               |                                             | Raven et al., 2008       | 74 | 26 | 0  |
|               |                                             | Campbell et al., 2011    | 88 | 12 | 0  |
|               | Ease of Understanding-<br>Take home message | Singh-Cundy & Shin, 2015 | 42 | 58 | 0  |
|               |                                             | Urry et al., 2014        | 93 | 7  | 0  |
|               |                                             | Sadava et al., 2009      | 97 | 3  | 0  |
|               |                                             | Raven et al., 2008       | 95 | 5  | 0  |
|               |                                             | Campbell et al., 2011    | 88 | 12 | 0  |
| Graph Choice  | Graph Type                                  | Singh-Cundy & Shin, 2015 | 75 | 25 | 0  |
|               |                                             | Urry et al., 2014        | 93 | 7  | 0  |
|               |                                             | Sadava et al., 2009      | 86 | 14 | 0  |
|               |                                             | Raven et al., 2008       | 71 | 29 | 0  |
|               |                                             | Campbell et al., 2011    | 88 | 12 | 0  |
|               | Data Displayed                              | Singh-Cundy & Shin, 2015 | 50 | 50 | 0  |



Appendix H: Detailed Version of Textbook Analysis using the Graph Rubric.

|  |           |                          |    |    |   |
|--|-----------|--------------------------|----|----|---|
|  |           | Urry et al., 2014        | 27 | 73 | 0 |
|  |           | Sadava et al., 2009      | 75 | 25 | 0 |
|  |           | Raven et al., 2008       | 74 | 26 | 0 |
|  |           | Campbell et al., 2011    | 77 | 23 | 0 |
|  | Alignment | Singh-Cundy & Shin, 2015 |    |    |   |
|  |           | Urry et al., 2014        |    |    |   |
|  |           | Sadava et al., 2009      |    |    |   |
|  |           | Raven et al., 2008       |    |    |   |
|  |           | Campbell et al., 2011    |    |    |   |
